# Supplementary material
Source: publisher figshare collection journal article supplement (https://karger.figshare.com/ndownloader/files/14057327)
Supplement: Supplementary file 1 [file 14057327]

Supplementary Table 1. Multivariate analysis of baseline characteristics of patients with NAFLD

| Variables | OR | 95% CI | *P* value |
| --- | --- | --- | --- |
| ALP | 1.005 | 0.999–1.010 | 0.087 |
| Hypertension | 5.868 | 1.114–30.925 | 0.037 |
| NAFLD fibrosis score | 2.275 | 1.528–3.386 | < 0.001 |

Abbreviations: NAFLD, non-alcoholic fatty liver disease; OR, odds ratio; CI, confidence interval; ALP, alkaline phosphatase
